# Supplementary material for: CRISPR/Cas9-mediated efficient and heritable targeted mutagenesis in tomato plants in the first and later generations
Source: PubMed Central journal article supplement (PMC4838866; doi:10.1038/srep24765), 2016-04-21
Supplement: srep24765-s1.pdf [file srep24765-s1.pdf]

# CRISPR/Cas9-mediated efficient and heritable targeted mutagenesis in tomato plants in the first and later generations

Changtian Pan<sup>1,2</sup>, Lei Ye<sup>1,2</sup>, Li Qin<sup>2</sup>, Xue Liu<sup>2</sup>, Yanjun He<sup>2</sup>, Jie wang<sup>2</sup>, Lifei Chen<sup>2</sup>, Gang Lu<sup>1,2\*</sup>

## Supplementary Information

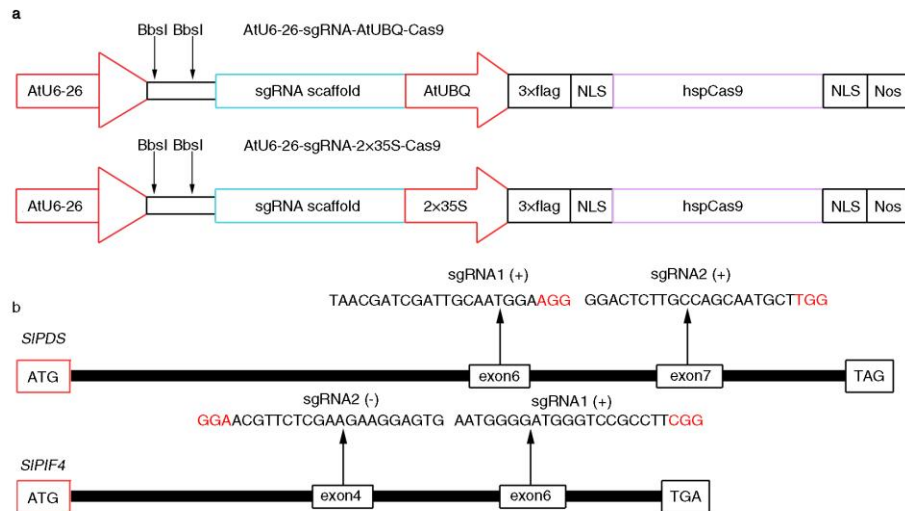

**Figure S1. Schematic diagrams for binary vectors used in this study and selected target sites in *SIPDS* and *SIPIF4*.** (a) Schematic view of the expression cassettes. Cas9 fused with a flag tag (3 ×flag) and two nuclear localization signal (NLS) is expressed by either *Cauliflower mosaic virus* 35S promoter or *Arabidopsis* UBQ promoter. The scaffold sequence of sgRNA is derived using U6 promoters of *Arabidopsis*. Two *Bbs* I sites are located among the U6 promoter and sgRNA scaffold. (b) Schematic illustrating the target sites of *SIPDS* and *SIPIF4*. All the 20-bp sequence are followed by a PAM sequence (NGG; red). +: plus strand; -: minus strand. ATG: initiation codon; TAG or TGA: termination codon.

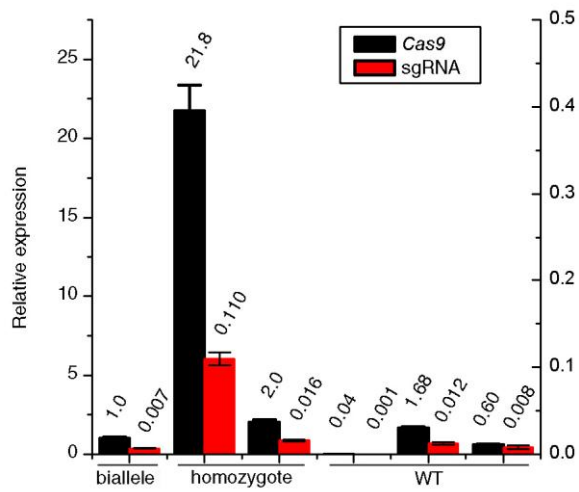

**Figure S2. Expression analysis of *Cas9* and sgRNA by RT-qPCR.** #WT, wild-type sequence with no mutation detected. \$The zygosity of homozygote, biallele and WT in T0 lines are putative. The *SIUbi3* was used as the internal control. The RT-qPCR products were verified by sequencing.



**Supplementary Table S1.** Genotyping of T0 independent transgenic lines of sgRNA1-*SIPDS*

| Target                  | Lines <sup>#</sup> | Zygoty <sup>§</sup> | Genotypes            | Total | Ratio |
|-------------------------|--------------------|---------------------|----------------------|-------|-------|
| sgRNA1-<br><i>SIPDS</i> | T0-1               | Chimera             | 1d1,6i1,2WT          | 15    | 71.4% |
|                         | T0-2               | Chimera             | 8d1,1d8,1d28,1i1,2WT |       |       |
|                         | T0-4               | Chimera             | 1d28,1c14,3WT        |       |       |
|                         | T0-5               | Chimera             | 1d2,6i1,3WT          |       |       |
|                         | T0-6               | Chimera             | 1d6,1i1,1c8,7WT      |       |       |
|                         | T0-10              | Chimera             | 2d1,1d65,3i1,4WT     |       |       |
|                         | T0-11              | Chimera             | 1d1,1d1a,2i1,3WT     |       |       |
|                         | T0-12              | Chimera             | 1d2,3d72,3WT         |       |       |
|                         | T0-14              | Chimera             | 1d55,2i1,2i1b,3WT    |       |       |
|                         | T0-15              | Chimera             | 1d1,1i1,4WT          |       |       |
|                         | T0-16              | Chimera             | 3d1,6i1,1i1a,        |       |       |
|                         | T0-19              | Chimera             | 5d5,2d11,1i1,3WT     |       |       |
|                         | T0-20              | Chimera             | 2d5,1d12,1c102,6WT   |       |       |
|                         | T0-21              | Chimera             | 1d2,1d4,2i1          |       |       |
|                         | T0-22              | Chimera             | 1d2,7i1,2WT          |       |       |
|                         | T0-3               | WT*                 |                      | 6     | 28.6% |
|                         | T0-7               | WT                  |                      |       |       |
|                         | T0-8               | WT                  |                      |       |       |
|                         | T0-9               | WT                  |                      |       |       |
|                         | T0-13              | WT                  |                      |       |       |
|                         | T0-18              | WT                  |                      |       |       |

<sup>#</sup>Line name is in the format of T0-#. <sup>§</sup>The zygoty of T0 lines is putative. \*WT, no mutation detected at target sites. d#, # of bp deleted at the target sites; i#, # of bases insertion at target sites; i#a, the same number of insertions at one site; i#b, the same number of insertions at other sites; c#, combined mutation.

**Supplementary Table S2.** Genotyping of T0 independent transgenic lines of sgRNA2-*SIPDS*

| Target                  | Lines | Zygoty   | Genotypes            | Total | Ratio |
|-------------------------|-------|----------|----------------------|-------|-------|
| sgRNA2-<br><i>SIPDS</i> | T0-5  | Biallele | 14d3,5d5             | 1     | 14.3% |
|                         | T0-1  | Chimera  | 1d2,1d4,1d23,1i2,1WT | 6     | 85.8% |
|                         | T0-2  | Chimera  | 1d2,3d5,1i1          |       |       |
|                         | T0-3  | Chimera  | 3d1,1d5,1WT          |       |       |
|                         | T0-4  | Chimera  | 2d1,1d3,1d4,1d102    |       |       |
|                         | T0-6  | Chimera  | 1d1,2d3,3WT          |       |       |
|                         | T0-7  | Chimera  | 6d3,1d5,4d14         |       |       |

See Supplementary Table S1 for lines naming and genotype denotation.

**Supplementary Table S3.** Genotyping of T0 independent transgenic lines of sgRNA1-*SIP1F4*.

| Target                | Lines | Zygosity   | Genotypes         | Total | Ratio |
|-----------------------|-------|------------|-------------------|-------|-------|
| sgRNA1- <i>SIP1F4</i> | T0-22 | Homozygote | d1                | 2     | 8.0%  |
|                       | T0-23 | Homozygote | d1                |       |       |
|                       | T0-7  | Biallele   | 7c2,7c14          | 3     | 18.8% |
|                       | T0-15 | Biallele   | 8d1,4d3           |       |       |
|                       | T0-19 | Biallele   | 9d1,1d19          |       |       |
|                       | T0-1  | Chimera    | 1d1,1d6,2WT       | 16    | 64.0% |
|                       | T0-2  | Chimera    | 2d4,2d18,5WT      |       |       |
|                       | T0-3  | Chimera    | 3d3,1d4,5i1       |       |       |
|                       | T0-4  | Chimera    | 2d1,1d20,1d61     |       |       |
|                       | T0-5  | Chimera    | 1d3,1d30,2WT      |       |       |
|                       | T0-8  | Chimera    | 1d1,1d3,1d7,1WT   |       |       |
|                       | T0-9  | Chimera    | 2d1,2d18,1c5      |       |       |
|                       | T0-10 | Chimera    | 2c51,1c126,1WT    |       |       |
|                       | T0-11 | Chimera    | 4d8,1c51,1c52,3WT |       |       |
|                       | T0-13 | Chimera    | 2d1,1d4,1d7       |       |       |
|                       | T0-14 | Chimera    | 2d1,2d4,1WT       |       |       |
|                       | T0-16 | Chimera    | 2d1,5d3,1d5,1i1   |       |       |
|                       | T0-20 | Chimera    | 1d1,1d5,2WT       |       |       |
|                       | T0-21 | Chimera    | 4d1,1d4,1d50,3i1  |       |       |
|                       | T0-24 | Chimera    | 2d1,1d4,1WT       |       |       |
|                       | T0-25 | Chimera    | 5d1,1d4,1d5       |       |       |
|                       | T0-6  | WT         |                   | 4     | 16.0% |
|                       | T0-12 | WT         |                   |       |       |
|                       | T0-17 | WT         |                   |       |       |
|                       | T0-18 | WT         |                   |       |       |

See Supplementary Table S1 for lines naming and genotype denotation.

**Supplementary Table S4.** Genotyping of T0 independent transgenic lines of sgRNA2-*SIP1F4*.

| Target                | Lines | Zygoty     | Genotypes            | Total | Ratio |
|-----------------------|-------|------------|----------------------|-------|-------|
| sgRNA2- <i>SIP1F4</i> | T0-13 | Homozygote | d1                   | 3     | 15.8% |
|                       | T0-17 | Homozygote | d1                   |       |       |
|                       | T0-19 | Homozygote | d1                   |       |       |
|                       | T0-2  | Biallele   | 13d1,2d3             | 5     | 26.3% |
|                       | T0-7  | Biallele   | 9d2,4d9              |       |       |
|                       | T0-8  | Biallele   | 6d2,6d9              |       |       |
|                       | T0-10 | Biallele   | 6d3,7i1              |       |       |
|                       | T0-18 | Biallele   | 7i1,6c43             |       |       |
|                       | T0-1  | Chimera    | 1d127,5i1,1WT        | 9     | 47.4% |
|                       | T0-4  | Chimera    | 1d1,4d6,3d17         |       |       |
|                       | T0-6  | Chimera    | 3d2,2d2a,2d3,1d4,2d9 |       |       |
|                       | T0-9  | Chimera    | 3d1,5d3,2d6          |       |       |
|                       | T0-11 | Chimera    | 3d2,1d3,2i1          |       |       |
|                       | T0-12 | Chimera    | 3d2,1d6,1d17,4d6a    |       |       |
|                       | T0-14 | Chimera    | 2d1,3d6,1d17,2i1     |       |       |
|                       | T0-15 | Chimera    | 5d1,4d2,1d2a         |       |       |
|                       | T0-16 | Chimera    | 3d1,1d2,1d3          |       |       |
|                       | T0-3  | WT         |                      | 2     | 10.5% |
|                       | T0-5  | WT         |                      |       |       |

See Supplementary Table S1 for lines naming and genotype denotation. d#a, the same number bases of deletion at one site.

**Supplementary Table S5.** Compare the genotypes of leaves and mixed tissues.

| Target                | Lines | Zygoty     | Genotypes of leaf | Genotypes of mixed tissues* |
|-----------------------|-------|------------|-------------------|-----------------------------|
| sgRNA1- <i>SIPIF4</i> | T0-22 | Homozygote | d1                | d1                          |
| sgRNA1- <i>SIPIF4</i> | T0-23 | Homozygote | d1                | d1                          |
| sgRNA2- <i>SIPIF4</i> | T0-13 | Homozygote | d1                | d1                          |
| sgRNA2- <i>SIPIF4</i> | T0-17 | Homozygote | d1                | d1                          |
| sgRNA2- <i>SIPIF4</i> | T0-19 | Homozygote | d1                | d1                          |
| sgRNA1- <i>SIPIF4</i> | T0-7  | Biallele   | 7c2,7c14          | 4c2,6c14                    |
| sgRNA1- <i>SIPIF4</i> | T0-15 | Biallele   | 8d1,4d3           | 5d1,4d3                     |
| sgRNA2- <i>SIPIF4</i> | T0-7  | Biallele   | 9d2,4d9           | 5d2,2d9                     |
| sgRNA2- <i>SIPIF4</i> | T0-8  | Biallele   | 6d2,6d9           | 6d2,2d9                     |
| sgRNA2- <i>SIPIF4</i> | T0-9  | Chimera    | 3d1,5d3,2d6       | 2d1,5d3,3d6                 |
| sgRNA1- <i>SIPDS</i>  | T0-22 | Chimera    | 1d2,7i1,2WT       | <u>1d6,1d13,2i1,6WT</u>     |
| sgRNA2- <i>SIPIF4</i> | T0-15 | Chimera    | 5d1,4d2,1c3       | 8d1,8d2                     |
| sgRNA1- <i>SIPIF4</i> | T0-6  | WT         | N <sup>#</sup>    | N                           |
| sgRNA2- <i>SIPIF4</i> | T0-5  | WT         | N                 | N                           |
| sgRNA1- <i>SIPDS</i>  | T0-13 | WT         | N                 | N                           |
| sgRNA1- <i>SIPDS</i>  | T0-18 | WT         | N                 | N                           |

See Supplementary Table S1 for lines naming and genotype denotation. \*Mixed tissues included leaves, shoots and flowers; <sup>#</sup>N, no mutation detected. Underline means new mutation were detected.



**Supplementary Table S6.** Genotyping the regeneration plantlets in T0 generation.

| Target              | Lines <sup>#</sup> | Zygoty     | Genotypes                         |
|---------------------|--------------------|------------|-----------------------------------|
| sgRNA2- <i>SIP4</i> | T0-13              | Homozygote | d1                                |
| sgRNA2- <i>SIP4</i> | T0-13(1)           | Homozygote | d1                                |
| sgRNA2- <i>SIP4</i> | T0-13(2)           | Homozygote | d1                                |
| sgRNA2- <i>SIP4</i> | T0-17              | Homozygote | d1                                |
| sgRNA2- <i>SIP4</i> | T0-17(1)           | Homozygote | d1                                |
| sgRNA2- <i>SIP4</i> | T0-17(2)           | Homozygote | d1                                |
| sgRNA1- <i>SIP4</i> | T0-22              | Homozygote | d1                                |
| sgRNA1- <i>SIP4</i> | T0-22(1)           | Homozygote | d1                                |
| sgRNA1- <i>SIP4</i> | T0-22(2)           | Homozygote | d1                                |
| sgRNA1- <i>SIP4</i> | T0-7               | Biallele   | 7c2,5c14                          |
| sgRNA1- <i>SIP4</i> | T0-7(1)            | Biallele   | 8c2,3c14                          |
| sgRNA2- <i>SIP4</i> | T0-7               | Biallele   | 9d2,4d9                           |
| sgRNA2- <i>SIP4</i> | T0-7(1)            | Biallele   | 6d2,3d9                           |
| sgRNA2- <i>SIP4</i> | T0-7(2)            | Biallele   | 4d2,4d9                           |
| sgRNA1- <i>SIP4</i> | T0-1               | Chimera    | 1d1,1d6,2WT                       |
| sgRNA1- <i>SIP4</i> | T0-1(1)            | Chimera    | 2d1,4 <u>d10</u> ,3WT             |
| sgRNA1- <i>SIP4</i> | T0-1(2)            | Chimera    | 1d1,6 <u>d10</u> ,3WT             |
| sgRNA2- <i>SIP4</i> | T0-9               | Chimera    | 3d1,5d3,2d6                       |
| sgRNA2- <i>SIP4</i> | T0-9(1)            | Chimera    | 1 <u>d2</u> ,2d3,5 <u>i1</u> ,2WT |
| sgRNA2- <i>SIP4</i> | T0-9(2)            | Chimera    | 1d1,1 <u>i1</u> ,7WT              |
| sgRNA1- <i>SIP4</i> | T0-6               | WT         | WT                                |
| sgRNA1- <i>SIP4</i> | T0-6(1)            | WT         | WT                                |
| sgRNA1- <i>SIP4</i> | T0-6(2)            | WT         | WT                                |
| sgRNA2- <i>SIP4</i> | T0-5               | WT         | WT                                |
| sgRNA2- <i>SIP4</i> | T0-5(1)            | WT         | WT                                |
| sgRNA2- <i>SIP4</i> | T0-5(2)            | WT         | WT                                |

<sup>#</sup>Line name of regeneration plantlets is in the format of T0-M(N), with N designated the plantlets regenerated from the T0 plant T0-M. Underline means new mutation were detected.

**Supplementary Table S7.** Segregation patterns of CRISPR/Cas9-mediated targeted mutagenesis during the T1 to T2 generation in T-DNA-free plants.

| Target gene   | sgRNA | Line#     | T1         |          |       | T2                   |       |
|---------------|-------|-----------|------------|----------|-------|----------------------|-------|
|               |       |           | Zygoty     | Genotype | T-DNA | Mutation segregation | T-DNA |
| <i>SIPIF4</i> | 1     | T1-22(14) | Homozygote | d1d1     | -     | 15d1d1               | 15-   |
| <i>SIPIF4</i> | 1     | T1-8(10)  | Homozygote | d1d1     | -     | 17d1d1               | 17-   |
| <i>SIPIF4</i> | 2     | T1-16(3)  | Homozygote | d2d2     | -     | 10d2d2               | 10-   |
| <i>SIPIF4</i> | 2     | T1-12(7)  | Homozygote | d2d2     | -     | 12d2d2               | 12-   |

#Line name is in the format of T1-M(N), with N designated the progeny of T1 plant T1-M. -, T-DNA was not detected.

**Supplementary Table S8.** Sequencing results of sgRNA1/2-*SIPDS* and sgRNA1/2-*SIPIF4* in T0 plants.

| Target                   | Genotypes                                                                  | The sequences of target sites                                              | Frequency |
|--------------------------|----------------------------------------------------------------------------|----------------------------------------------------------------------------|-----------|
| sgRNA1<br><i>SIPDS</i> - | T0-1                                                                       |                                                                            |           |
|                          | WT                                                                         | GGGATTAACGATCGATTGCAATGGAAGGAACATTC                                        | 2/9       |
|                          | d1                                                                         | GGGATTAACGATCGATTGCAA-GGAAGGAACATTC                                        | 1/9       |
|                          | i1                                                                         | GGGATTAACGATCGATTGCAATGGAAGGAACATTC                                        | 6/9       |
|                          | T0-2                                                                       |                                                                            |           |
|                          | WT                                                                         | GGGATTAACGATCGATTGCAATGGAAGGAACATTC                                        | 2/13      |
|                          | d1                                                                         | GGGATTAACGATCGATTGCAA-GGAAGGAACATTC                                        | 8/13      |
|                          | d8                                                                         | GGGATTAACGATC-----TGGAAGGAACATTC                                           | 1/13      |
|                          | d28                                                                        | GATCGA-----TTGCAA                                                          | 1/13      |
|                          | i1                                                                         | GGGATTAACGATCGATTGCAATGGAAGGAACATTC                                        | 1/13      |
|                          | T0-3                                                                       |                                                                            |           |
|                          | WT                                                                         | GGGATTAACGATCGATTGCAATGGAAGGAACATTC<br>GGGATTAACGATCGATTGCAATGGAAGGAACATTC |           |
|                          | T0-4                                                                       |                                                                            |           |
|                          | WT                                                                         | GGGATTAACGATCGATTGCAATGGAAGGAACATTC                                        | 3/5       |
|                          | d28                                                                        | GGGATTAACGATCGATTGCAA-----                                                 | 1/5       |
|                          | c14                                                                        | GGGATTAACGATTGGAAGGAA-----CATTC                                            | 1/5       |
|                          | T0-5                                                                       |                                                                            |           |
|                          | WT                                                                         | GGGATTAACGATCGATTGCAATGGAAGGAACATTC                                        | 3/10      |
|                          | d2                                                                         | GGGATTAACGATCGATTGC--TGGAAGGAACATTC                                        | 1/10      |
|                          | i1                                                                         | GGGATTAACGATCGATTGCAATGGAAGGAACATTC                                        | 6/10      |
|                          | T0-6                                                                       |                                                                            |           |
|                          | WT                                                                         | GGGATTAACGATCGATTGCAATGGAAGGAACATTC                                        | 7/10      |
|                          | d6                                                                         | GGGATTAACGATCGAT-----GGAAGGAACATTC                                         | 1/10      |
|                          | i1                                                                         | GGGATTAACGATCGATTGCAATGGAAGGAACATTC                                        | 1/10      |
|                          | c5                                                                         | GGGATTAACGATCGATTGCAATGAAA-----CATTC                                       | 1/10      |
|                          | T0-7                                                                       |                                                                            |           |
|                          | WT                                                                         | GGGATTAACGATCGATTGCAATGGAAGGAACATTC<br>GGGATTAACGATCGATTGCAATGGAAGGAACATTC |           |
|                          | T0-8                                                                       |                                                                            |           |
|                          | WT                                                                         | GGGATTAACGATCGATTGCAATGGAAGGAACATTC<br>GGGATTAACGATCGATTGCAATGGAAGGAACATTC |           |
|                          | T0-9                                                                       |                                                                            |           |
| WT                       | GGGATTAACGATCGATTGCAATGGAAGGAACATTC<br>GGGATTAACGATCGATTGCAATGGAAGGAACATTC |                                                                            |           |
| T0-10                    |                                                                            |                                                                            |           |
| WT                       | GGGATTAACGATCGATTGCAATGGAAGGAACATTC                                        | 4/10                                                                       |           |
| d2                       | GGGATTAACGATCGATTGC--TGGAAGGAACATTC                                        | 2/10                                                                       |           |
| d65                      | ATTAGG-----AATTCA                                                          | 1/10                                                                       |           |
| i1                       | GGGATTAACGATCGATTGCAATGGAAGGAACATTC                                        | 3/10                                                                       |           |

|        |       |                                                                            |      |  |
|--------|-------|----------------------------------------------------------------------------|------|--|
|        | T0-11 |                                                                            |      |  |
|        | WT    | GGGATTAACGATCGATTGCAATGGAAGGAACATTC                                        | 3/7  |  |
|        | d1    | GGGATTAACGATCGATTGCAA-GGAAGGAACATTC                                        | 1/7  |  |
|        | d1b   | GGGATTAACGATCGATTGCA-TGGAAGGAACATTC                                        | 1/7  |  |
|        | i1    | GGGATTAACGATCGATTGCAATGGAAGGAACATTC                                        | 2/7  |  |
|        | T0-12 |                                                                            |      |  |
|        | WT    | GGGATTAACGATCGATTGCAATGGAAGGAACATTC                                        | 3/7  |  |
|        | d3    | GGGATTAACGATCGATTGC---GGAAGGAACATTC                                        | 1/7  |  |
|        | d72   | GGAGAATT-----CAGCCG                                                        | 3/7  |  |
|        | T0-13 |                                                                            |      |  |
|        | WT    | GGGATTAACGATCGATTGCAATGGAAGGAACATTC<br>GGGATTAACGATCGATTGCAATGGAAGGAACATTC |      |  |
| sgRNA1 | T0-13 | Mixed tissues                                                              |      |  |
| SIPDS- | WT    | GGGATTAACGATCGATTGCAATGGAAGGAACATTC<br>GGGATTAACGATCGATTGCAATGGAAGGAACATTC |      |  |
|        | T0-14 |                                                                            |      |  |
|        | WT    | GGGATTAACGATCGATTGCAATGGAAGGAACATTC                                        | 3/8  |  |
|        | d55   | TATTCA-----ATGATA                                                          | 1/8  |  |
|        | i1    | GGGATTAACGATCGATTGCAATGGAAGGAACATTC                                        | 2/8  |  |
|        | i1b   | GGGATTAACGATCGATTGCAAATGGAAGGAACATTC                                       | 2/8  |  |
|        | T0-15 |                                                                            |      |  |
|        | WT    | GGGATTAACGATCGATTGCAATGGAAGGAACATTC                                        | 4/6  |  |
|        | d1    | GGGATTAACGATCGATTGCA-TGGAAGGAACATTC                                        | 1/6  |  |
|        | i1    | GGGATTAACGATCGATTGCAATGGAAGGAACATTC                                        | 1/6  |  |
|        | T0-16 |                                                                            |      |  |
|        | WT    | GGGATTAACGATCGATTGCAATGGAAGGAACATTC                                        |      |  |
|        | d1    | GGGATTAACGATCGATTGCAA-GGAAGGAACATTC                                        | 3/10 |  |
|        | i1    | GGGATTAACGATCGATTGCAATGGAAGGAACATTC                                        | 6/10 |  |
|        | i1a   | GGGATTAACGATCGATTGCAATAGGAAGGAACATTC                                       | 1/10 |  |
|        | T0-18 |                                                                            |      |  |
|        | WT    | GGGATTAACGATCGATTGCAATGGAAGGAACATTC<br>GGGATTAACGATCGATTGCAATGGAAGGAACATTC |      |  |
|        | T0-18 | Mixed tissues                                                              |      |  |
|        | WT    | GGGATTAACGATCGATTGCAATGGAAGGAACATTC<br>GGGATTAACGATCGATTGCAATGGAAGGAACATTC |      |  |
|        | T0-19 |                                                                            |      |  |
|        | WT    | GGGATTAACGATCGATTGCAATGGAAGGAACATTC                                        | 3/11 |  |
|        | i1    | GGGATTAACGATCGATTGCAATGGAAGGAACATTC                                        | 1/11 |  |
|        | d5    | GGGATTAACGATCGATTG-----GAAGGAACATTC                                        | 5/11 |  |
|        | d12   | GGGATTAACGATCG-----GGAACATTC                                               | 2/11 |  |
|        | T0-20 |                                                                            |      |  |
|        | WT    | GGGATTAACGATCGATTGCAATGGAAGGAACATTC                                        | 6/10 |  |
|        | d5    | GGGATTAACGATCGATT-----GGAAGGAACATTC                                        | 2/10 |  |
|        | d12   | GGGATTAACGATCG-----GGAACATTC                                               | 1/10 |  |

|        |       |                                                         |       |
|--------|-------|---------------------------------------------------------|-------|
|        | c102  | GCTTAC-----A-----AGCCGC                                 | 1/10  |
|        | T0-21 |                                                         |       |
|        | WT    | GGGATTAACGATCGATTGCAATGGAAGGAACATTC                     |       |
|        | i1    | GGGATTAACGATCGATTGCAAT <b>T</b> GGAAGGAACATTC           | 2/4   |
|        | d2    | GGGATTAACGATCGATTGCAAT--AAGGAACATTC                     | 1/4   |
|        | d4    | GGGATTAACGATCGATTG----GGAAGGAACATTC                     | 1/4   |
|        | T0-22 |                                                         |       |
|        | WT    | GGGATTAACGATCGATTGCAATGGAAGGAACATTC                     | 2/10  |
|        | i1    | GGGATTAACGATCGATTGCAAT <b>T</b> GGAAGGAACATTC           | 7/10  |
| sgRNA1 | d2    | GGGATTAACGATCGATTGC--TGGAAGGAACATTC                     | 1/10  |
| -SIPDS | T0-22 | Mixed tissues                                           |       |
|        | WT    | GGGATTAACGATCGATTGCAATGGAAGGAACATTC                     | 6/10  |
|        | i1    | GGGATTAACGATCGATTGCAAT <b>T</b> GGAAGGAACATTC           | 2/10  |
|        | d6    | GGGATTAACGATCGAT-----GGAAGGAACATTC                      | 1/10  |
|        | d13   | GGGATTAACGATC-----GGAACATTC                             | 1/10  |
| <hr/>  |       |                                                         |       |
|        | T0-1  |                                                         |       |
|        | WT    | CAATTGGACTCTTGCCAGCAATGCT <b>TGG</b> AGGGCAA            | 1/5   |
|        | d4    | CAATTGGACTCTTGCCA-----TGCT <b>TGG</b> AGGGCAA           | 1/5   |
|        | d23   | C----- <b>TGG</b> AGGGCAA                               | 1/5   |
|        | d2    | CAATTGGACTCTTGCCAGC--TGCT <b>TGG</b> AGGGCAA            | 1/5   |
|        | i2    | AATTGGACTCTTGCCAGCAAT <b>T</b> ATGCT <b>TGG</b> AGGGCAA | 1/5   |
|        | T0-2  |                                                         |       |
|        | WT    | CAATTGGACTCTTGCCAGCAATGCT <b>TGG</b> AGGGCAA            |       |
|        | d5    | CAATTGGACTCTTGCC-----TGCT <b>TGG</b> AGGGCAA            | 3/5   |
|        | d2    | CAATTGGACTCTTGCCAGCA--GCT <b>TGG</b> AGGGCAA            | 1/5   |
|        | i1    | CAATTGGACTCTTGCCAGCAAT <b>T</b> GCT <b>TGG</b> AGGGCAA  | 1/5   |
|        | T0-3  |                                                         |       |
|        | WT    | CAATTGGACTCTTGCCAGCAATGCT <b>TGG</b> AGGGCAA            | 1/5   |
|        | d1    | CAATTGGACTCTTGCCAGCA-TGCT <b>TGG</b> AGGGCAA            | 3/5   |
|        | d5    | CAATTGGACTCTTGCC-----TGCT <b>TGG</b> AGGGCAA            | 1/5   |
|        | T0-4  |                                                         |       |
|        | WT    | CAATTGGACTCTTGCCAGCAATGCT <b>TGG</b> AGGGCAA            |       |
|        | d1    | CAATTGGACTCTTGCCAGCA-TGCT <b>TGG</b> AGGGCAA            | 2/5   |
| sgRNA2 | d3    | CAATTGGACTCTTGCCAG---TGCT <b>TGG</b> AGGGCAA            | 1/5   |
| -SIPDS | d4    | CAATTGGACTCTTGCCA-----TGCT <b>TGG</b> AGGGCAA           | 1/5   |
|        | d102  | CTTA-----AAAG                                           | 1/5   |
|        | T0-5  |                                                         |       |
|        | WT    | CAATTGGACTCTTGCCAGCAATGCT <b>TGG</b> AGGGCAA            |       |
|        | d5    | CAATTGGACTCTTGCCAGC----- <b>TGG</b> AGGGCAA             | 5/19  |
|        | d3    | CAATTGGACTCTTGCCAGCAA--- <b>TGG</b> AGGGCAA             | 14/19 |
|        | T0-6  |                                                         |       |
|        | WT    | CAATTGGACTCTTGCCAGCAATGCT <b>TGG</b> AGGGCAA            | 3/6   |
|        | d3    | CAATTGGACTCTTGCCAGC---GCT <b>TGG</b> AGGGCAA            | 2/6   |
|        | d1    | CAATTGGACTCTTGCCAGCAA-GCT <b>TGG</b> AGGGCAA            | 1/6   |

|         |         |                                       |      |  |
|---------|---------|---------------------------------------|------|--|
|         | T0-7    |                                       |      |  |
|         | WT      | CAATTGGACTCTTGCCAGCAATGCTTGGAGGGCAA   |      |  |
|         | d14     | CAATTGG-----TGCTTGGAGGGCAA            | 4/11 |  |
|         | d5      | CAATTGGACTCTTGCCA-----GCTTGGAGGGCAA   | 1/11 |  |
|         | d3      | CAATTGGACTCTTGCCAGC---GCTTGGAGGGCAA   | 6/11 |  |
| <hr/>   |         |                                       |      |  |
|         | T0-1    |                                       |      |  |
|         | WT      | ATGGGAATGGGGATGGGTCCGCCTTCGGTGCCTTC   | 2/4  |  |
|         | d6      | ATGGGAATGGGGATGG-----CTTCGGTGCCTTC    | 1/4  |  |
|         | d1      | ATGGGAATGGGGATGGGTCCG-CTTCGGTGCCTTC   | 1/4  |  |
|         | T0-1(1) |                                       |      |  |
|         | WT      | ATGGGAATGGGGATGGGTCCGCCTTCGGTGCCTTC   | 3/9  |  |
| sgRNA1  | d10     | ATGGGAATGGGGAT-----TCGGTGCCTTC        | 4/9  |  |
| -SIP1F4 | d1      | ATGGGAATGGGGATGGGTCCG-CTTCGGTGCCTTC   | 2/9  |  |
|         | T0-1(2) |                                       |      |  |
|         | WT      | ATGGGAATGGGGATGGGTCCGCCTTCGGTGCCTTC   | 3/10 |  |
|         | d10     | ATGGGAATGGGGAT-----TCGGTGCCTTC        | 6/10 |  |
|         | d1      | ATGGGAATGGGGATGGGTCCG-CTTCGGTGCCTTC   | 1/10 |  |
|         | T0-2    |                                       |      |  |
|         | WT      | ATGGGAATGGGGATGGGTCCGCCTTCGGTGCCTTC   | 5/9  |  |
|         | d4      | ATGGGAATGGGGATGGGT---CTTCGGTGCCTTC    | 2/9  |  |
|         | d18     | ATGG-----CTTCGGTGCCTTC                | 2/9  |  |
|         | T0-3    |                                       |      |  |
|         | WT      | ATGGGAATGGGGATGGGTCCGCCTTCGGTGCCTTC   |      |  |
|         | d4      | ATGGGAATGGGGATGGGT---CTTCGGTGCCTTC    | 1/9  |  |
|         | i1      | ATGGGAATGGGGATGGGTCCGCACCTTCGGTGCCTTC | 5/9  |  |
|         | d3      | ATGGGAATGGGGATGGGTTC---CTTCGGTGCCTTC  | 3/9  |  |
|         | T0-4    |                                       |      |  |
|         | WT      | ATGGGAATGGGGATGGGTCCGCCTTCGGTGCCTTC   |      |  |
|         | d1      | ATGGGAATGGGGATGGGTCC-CCTTCGGTGCCTTC   | 2/4  |  |
|         | d20     | ATGGGAA-----GTGCCTTC                  | 1/4  |  |
|         | d61     | CATTT-----GCTA                        | 1/4  |  |
|         | T0-5    |                                       |      |  |
|         | WT      | ATGGGAATGGGGATGGGTCCGCCTTCGGTGCCTTC   | 2/4  |  |
|         | d3      | ATGGGAATGGGGATGGGTCCGCC---GGTGCCTTC   | 1/4  |  |
|         | d30     | C-----GGTGCCTTC                       | 1/4  |  |
|         | T0-6    |                                       |      |  |
|         | WT      | ATGGGAATGGGGATGGGTCCGCCTTCGGTGCCTTC   |      |  |
|         |         | ATGGGAATGGGGATGGGTCCGCCTTCGGTGCCTTC   |      |  |
|         | T0-6    | Mixed tissues                         |      |  |
|         | WT      | ATGGGAATGGGGATGGGTCCGCCTTCGGTGCCTTC   |      |  |
|         |         | ATGGGAATGGGGATGGGTCCGCCTTCGGTGCCTTC   |      |  |
|         | T0-6(1) |                                       |      |  |
|         | WT      | ATGGGAATGGGGATGGGTCCGCCTTCGGTGCCTTC   |      |  |
|         |         | ATGGGAATGGGGATGGGTCCGCCTTCGGTGCCTTC   |      |  |

|                 |         |                                      |      |  |  |
|-----------------|---------|--------------------------------------|------|--|--|
|                 | T0-6(2) |                                      |      |  |  |
|                 | WT      | ATGGGAATGGGGATGGGTCCGCCTTCGGTGCCTTC  |      |  |  |
|                 |         | ATGGGAATGGGGATGGGTCCGCCTTCGGTGCCTTC  |      |  |  |
|                 | T0-7    |                                      |      |  |  |
|                 | WT      | ATGGGAATGGGGATGGGTCCGCCTTCGGTGCCTTC  |      |  |  |
|                 | c2      | ATGGGAATGGGGATGGGTCCG-CTTCGGTGCCTTC  | 7/12 |  |  |
|                 | c14     | GGGAATGGGGATGGTGTCCAA-CACTACATT-TC   | 5/12 |  |  |
|                 | T0-7    | Mixed tissues                        |      |  |  |
| sgRNA1          | WT      | ATGGGAATGGGGATGGGTCCGCCTTCGGTGCCTTC  |      |  |  |
| - <i>SIP1F4</i> | c2      | ATGGGAATGGGGATGGGTCCG-CTTCGGTGCCTTC  | 4/10 |  |  |
|                 | c14     | GGGAATGGGGATGGTGTCCAA-CACTACATT-TC   | 6/10 |  |  |
|                 | T0-7(1) |                                      |      |  |  |
|                 | WT      | ATGGGAATGGGGATGGGTCCGCCTTCGGTGCCTTC  |      |  |  |
|                 | c2      | ATGGGAATGGGGATGGGTCCG-CTTCGGTGCCTTC  | 8/11 |  |  |
|                 | c14     | GGGAATGGGGATGGTGTCCAA-CACTACATT-TC   | 3/11 |  |  |
|                 | T0-8    |                                      |      |  |  |
|                 | WT      | ATGGGAATGGGGATGGGTCCGCCTTCGGTGCCTTC  | 1/4  |  |  |
|                 | d7      | ATGGGAATGGGGATG-----CTTCGGTGCCTTC    | 1/4  |  |  |
|                 | d1      | ATGGGAATGGGGATGGGTCCG-CTTCGGTGCCTTC  | 1/4  |  |  |
|                 | d3      | ATGGGAATGGGGATGGGTG---CTTCGGTGCCTTC  | 1/4  |  |  |
|                 | T0-9    |                                      |      |  |  |
|                 | WT      | ATGGGAATGGGGATGGGTCCGCCTTCGGTGCCTTC  |      |  |  |
|                 | d1      | ATGGGAATGGGGATGGGTCCG-CTTCGGTGCCTTC  | 2/5  |  |  |
|                 | d18     | ATGGGAATGGGGATGGGTCC-----GCAC        | 2/5  |  |  |
|                 | c62     | GTTTCCAACACTACATGTCCA---AATATATGATTC | 1/5  |  |  |
|                 | T0-10   |                                      |      |  |  |
|                 | WT      | ATGGGAATGGGGATGGGTCCGCCTTCGGTGCCTTC  | 1/4  |  |  |
|                 | c51     | TGGTGATATTCAGATGATGTGGATGGGAAGTG--G  | 2/4  |  |  |
|                 | c126    | ATATTCAGATGATGTGGATGGGAAGTG--GCATTT  | 1/4  |  |  |
|                 | T0-11   |                                      |      |  |  |
|                 | WT      | ATGGGAATGGGGATGGGTCCGCCTTCGGTGCCTTC  | 3/9  |  |  |
|                 | d8      | ATGGGAATGGGGAT-----CTTCGGTGCCTTC     | 4/9  |  |  |
|                 | c52     | TTCCA-----TGACAATGCTAT-----GCATTT    | 1/9  |  |  |
|                 | c51     | TGATATTCAGATGATGTGGATGGGAAGTG-GCATT  | 1/9  |  |  |
|                 | T0-12   |                                      |      |  |  |
|                 | WT      | ATGGGAATGGGGATGGGTCCGCCTTCGGTGCCTTC  |      |  |  |
|                 |         | ATGGGAATGGGGATGGGTCCGCCTTCGGTGCCTTC  |      |  |  |
| sgRNA1          | T0-13   |                                      |      |  |  |
| - <i>SIP1F4</i> | WT      | ATGGGAATGGGGATGGGTCCGCCTTCGGTGCCTTC  |      |  |  |
|                 | d1      | ATGGGAATGGGGATGGGTCCG-CTTCGGTGCCTTC  | 2/4  |  |  |
|                 | d4      | ATGGGAATGGGGATGGGT----CTTCGGTGCCTTC  | 1/4  |  |  |
|                 | d7      | ATGGGAATGGGGATG-----CTTCGGTGCCTTC    | 1/4  |  |  |
|                 | T0-14   |                                      |      |  |  |
|                 | WT      | ATGGGAATGGGGATGGGTCCGCCTTCGGTGCCTTC  | 1/5  |  |  |

|         |          |                                                                            |      |
|---------|----------|----------------------------------------------------------------------------|------|
|         | d1       | ATGGGAATGGGGATGGGTCCG-CTTCGGTGCCTTC                                        | 2/5  |
|         | d4       | ATGGGAATGGGGATGGGT-----CTTCGGTGCCTTC                                       | 2/5  |
|         | T0-15    |                                                                            |      |
|         | WT       | ATGGGAATGGGGATGGGTCCGCCTTCGGTGCCTTC                                        |      |
|         | d3       | ATGGGAATGGGGATGGGTCCGC---CGGTGCCTTC                                        | 4/12 |
|         | d1       | ATGGGAATGGGGATGGGTCCG-CTTCGGTGCCTTC                                        | 8/12 |
|         | T0-15    | Mixed tissues                                                              |      |
|         | WT       | ATGGGAATGGGGATGGGTCCGCCTTCGGTGCCTTC                                        |      |
|         | d3       | ATGGGAATGGGGATGGGTCCGC---CGGTGCCTTC                                        | 4/9  |
|         | d1       | ATGGGAATGGGGATGGGTCCG-CTTCGGTGCCTTC                                        | 5/9  |
|         | T0-16    |                                                                            |      |
|         | WT       | ATGGGAATGGGGATGGGTCCGCCTTCGGTGCCTTC                                        |      |
|         | d3       | ATGGGAATGGGGATGGGTCCGC---CGGTGCCTTC                                        | 5/9  |
|         | d5       | ATGGGAATGGGGATGGGTCT-----TTCGGTGCCTTC                                      | 1/9  |
|         | d1       | ATGGGAATGGGGATGGGTCCG-CTTCGGTGCCTTC                                        | 2/9  |
|         | i1       | ATGGGAATGGGGATGGGTCCGCACCTTCGGTGCCTTC                                      | 1/9  |
|         | T0-17    |                                                                            |      |
|         | WT       | ATGGGAATGGGGATGGGTCCGCCTTCGGTGCCTTC<br>ATGGGAATGGGGATGGGTCCGCCTTCGGTGCCTTC |      |
|         | T0-18    |                                                                            |      |
|         | WT       | ATGGGAATGGGGATGGGTCCGCCTTCGGTGCCTTC<br>ATGGGAATGGGGATGGGTCCGCCTTCGGTGCCTTC |      |
|         | T0-19    | ATGGGAATGGGGATGGGTCCGCCTTCGGTGCCTTC                                        |      |
|         | d1       | ATGGGAATGGGGATGGGTCCG-CTTCGGTGCCTTC                                        | 9/10 |
| sgRNA1  | d19      | ATGG-----TTCGGTGCCTTC                                                      | 1/10 |
| -SIPIF4 | T0-20    |                                                                            |      |
|         | WT       | ATGGGAATGGGGATGGGTCCGCCTTCGGTGCCTTC                                        | 2/4  |
|         | d1       | ATGGGAATGGGGATGGGTCCG-CTTCGGTGCCTTC                                        | 1/4  |
|         | d5       | ATGGGAATGGGGATGGG-----CTTCGGTGCCTTC                                        | 1/4  |
|         | T0-21    |                                                                            |      |
|         | WT       | ATGGGAATGGGGATGGGTCCGCCTTCGGTGCCTTC                                        |      |
|         | i1       | ATGGGAATGGGGATGGGTCCGCACCTTCGGTGCCTTC                                      | 3/9  |
|         | d1       | ATGGGAATGGGGATGGGTCCG-CTTCGGTGCCTTC                                        | 4/9  |
|         | d4       | ATGGGAATGGGGATGGGT-----CTTCGGTGCCTTC                                       | 1/9  |
|         | d50      | GGTGTC-----TTCC                                                            | 1/9  |
|         | T0-22    |                                                                            |      |
|         | WT       | ATGGGAATGGGGATGGGTCCGCCTTCGGTGCCTTC                                        |      |
|         | d1       | ATGGGAATGGGGATGGGTCCG-CTTCGGTGCCTTC                                        |      |
|         | T0-22    | Mixed tissues                                                              |      |
|         | WT       | ATGGGAATGGGGATGGGTCCGCCTTCGGTGCCTTC                                        |      |
|         | d1       | ATGGGAATGGGGATGGGTCCG-CTTCGGTGCCTTC                                        |      |
|         | T0-22(1) |                                                                            |      |
|         | WT       | ATGGGAATGGGGATGGGTCCGCCTTCGGTGCCTTC                                        |      |
|         | d1       | ATGGGAATGGGGATGGGTCCG-CTTCGGTGCCTTC                                        |      |



|                     |                                        |       |
|---------------------|----------------------------------------|-------|
| T0-22(2)            |                                        |       |
| WT                  | ATGGGAATGGGGATGGGTCCGCCTTCGGTGCCTTC    |       |
| d1                  | ATGGGAATGGGGATGGGTCCG-CTTCGGTGCCTTC    |       |
| T0-23               |                                        |       |
| WT                  | ATGGGAATGGGGATGGGTCCGCCTTCGGTGCCTTC    |       |
| d1                  | ATGGGAATGGGGATGGGTCCG-CTTCGGTGCCTTC    |       |
| T0-23 Mixed tissues |                                        |       |
| WT                  | ATGGGAATGGGGATGGGTCCGCCTTCGGTGCCTTC    |       |
| d1                  | ATGGGAATGGGGATGGGTCCG-CTTCGGTGCCTTC    |       |
| T0-24               |                                        |       |
| WT                  | ATGGGAATGGGGATGGGTCCGCCTTCGGTGCCTTC    | 1/4   |
| d1                  | ATGGGAATGGGGATGGGTCCG-CTTCGGTGCCTTC    | 2/4   |
| d4                  | ATGGGAATGGGGATGGGT----CTTCGGTGCCTTC    | 1/4   |
| T0-25               |                                        |       |
| WT                  | ATGGGAATGGGGATGGGTCCGCCTTCGGTGCCTTC    |       |
| d1                  | ATGGGAATGGGGATGGGTCCG-CTTCGGTGCCTTC    | 5/7   |
| sgRNA1<br>-SIPIF4   | d5 ATGGGAATGGGGATGGG-----CTTCGGTGCCTTC | 1/7   |
|                     | d4 ATGGGAATGGGGATGGGT----CTTCGGTGCCTTC | 1/7   |
| -----               |                                        |       |
| T0-1                |                                        |       |
| WT                  | GTAGAGTGAGGAAGAAGCTCTTGCAAGGCCTTCAT    | 3/9   |
| i1                  | GTAGAGTGAGGAAGAAGCTCTTGCAAGGCCTTCAT    | 5/9   |
| d128                | CATGA-----TTAAGGTG                     | 1/9   |
| T0-2                |                                        |       |
| WT                  | GTAGAGTGAGGAAGAAGCTCTTGCAAGGCCTTCAT    |       |
| d3                  | GTAGAGTGAGGAAGAAGCT---GCAAGGCCTTCAT    | 2/15  |
| sgRNA2<br>-SIPIF4   | d1 GTAGAGTGAGGAAGAAGCTCT-GCAAGGCCTTCAT | 13/15 |
| T0-3                |                                        |       |
| WT                  | GTAGAGTGAGGAAGAAGCTCTTGCAAGGCCTTCAT    |       |
|                     | GTAGAGTGAGGAAGAAGCTCTTGCAAGGCCTTCAT    |       |
| T0-4                |                                        |       |
| WT                  | GTAGAGTGAGGAAGAAGCTCTTGCAAGGCCTTCAT    |       |
| d6                  | GTAGAGTGAGGAAGAA-----GCAAGGCCTTCAT     | 4/8   |
| d1                  | GTAGAGTGAGGAAGAAGCTCT-GCAAGGCCTTCAT    | 1/8   |
| d17                 | GTAGAGTGAGG-----CCTTCAT                | 3/8   |
| T0-5                |                                        |       |
| WT                  | GTAGAGTGAGGAAGAAGCTCTTGCAAGGCCTTCAT    |       |
|                     | GTAGAGTGAGGAAGAAGCTCTTGCAAGGCCTTCAT    |       |
| T0-5 Mixed tissues  |                                        |       |
| WT                  | GTAGAGTGAGGAAGAAGCTCTTGCAAGGCCTTCAT    |       |
|                     | GTAGAGTGAGGAAGAAGCTCTTGCAAGGCCTTCAT    |       |
| T0-5(1)             |                                        |       |
| WT                  | GTAGAGTGAGGAAGAAGCTCTTGCAAGGCCTTCAT    |       |
|                     | GTAGAGTGAGGAAGAAGCTCTTGCAAGGCCTTCAT    |       |
| T0-5(2)             |                                        |       |

|         |                                       |      |
|---------|---------------------------------------|------|
| WT      | GTAGAGTGAGGAAGAAGCTCTTGCAAGGCCTTCAT   |      |
|         | GTAGAGTGAGGAAGAAGCTCTTGCAAGGCCTTCAT   |      |
| T0-6    |                                       |      |
| WT      | GTAGAGTGAGGAAGAAGCTCTTGCAAGGCCTTCAT   |      |
| d2      | GTAGAGTGAGGAAGAAGCT--TGCAAGGCCTTCAT   | 3/10 |
| d3      | GTAGAGTGAGGAAGAAGCT---GCAAGGCCTTCAT   | 2/10 |
| d9      | GTAGAGTGAGGAA-----GCAAGGCCTTCAT       | 2/10 |
| d2a     | GTAGAGTGAGGAAGAAGCTC--GCAAGGCCTTCAT   | 2/10 |
| d4      | GTAGAGTGAGGAAGAAGC---GCAAGGCCTTCAT    | 1/10 |
| T0-7    |                                       |      |
| WT      | GTAGAGTGAGGAAGAAGCTCTTGCAAGGCCTTCAT   |      |
| d9      | GTAGAGTGAGGAA-----GCAAGGCCTTCAT       | 4/13 |
| d2      | GTAGAGTGAGGAAGAAGCTC--GCAAGGCCTTCAT   | 9/13 |
| T0-7    | Mixed tissues                         |      |
| WT      | GTAGAGTGAGGAAGAAGCTCTTGCAAGGCCTTCAT   |      |
| d9      | GTAGAGTGAGGAA-----GCAAGGCCTTCAT       | 2/7  |
| d2      | GTAGAGTGAGGAAGAAGCTC--GCAAGGCCTTCAT   | 5/7  |
| T0-7(1) |                                       |      |
| WT      | GTAGAGTGAGGAAGAAGCTCTTGCAAGGCCTTCAT   |      |
| d9      | GTAGAGTGAGGAA-----GCAAGGCCTTCAT       | 3/9  |
| d2      | GTAGAGTGAGGAAGAAGCTC--GCAAGGCCTTCAT   | 6/9  |
| T0-7(2) |                                       |      |
| WT      | GTAGAGTGAGGAAGAAGCTCTTGCAAGGCCTTCAT   |      |
| d9      | GTAGAGTGAGGAA-----GCAAGGCCTTCAT       | 4/8  |
| d2      | GTAGAGTGAGGAAGAAGCTC--GCAAGGCCTTCAT   | 4/8  |
| T0-8    |                                       |      |
| WT      | GTAGAGTGAGGAAGAAGCTCTTGCAAGGCCTTCAT   |      |
| d2      | GTAGAGTGAGGAAGAAGCTC--GCAAGGCCTTCAT   | 6/12 |
| d9      | GTAGAGTGAGGAA-----GCAAGGCCTTCAT       | 6/12 |
| T0-9    |                                       |      |
| WT      | GTAGAGTGAGGAAGAAGCTCTTGCAAGGCCTTCAT   |      |
| d6      | GTAGAGTGAGGAAGA-----TGCAAGGCCTTCAT    | 2/10 |
| d3      | GTAGAGTGAGGAAGAAGC---TGCAAGGCCTTCAT   | 5/10 |
| d1      | GTAGAGTGAGGAAGAAGCTCT-GCAAGGCCTTCAT   | 3/10 |
| T0-9    | Mixed tissues                         |      |
| WT      | GTAGAGTGAGGAAGAAGCTCTTGCAAGGCCTTCAT   |      |
| d6      | GTAGAGTGAGGAAGA-----TGCAAGGCCTTCAT    | 3/10 |
| d3      | GTAGAGTGAGGAAGAAGC---TGCAAGGCCTTCAT   | 5/10 |
| d1      | GTAGAGTGAGGAAGAAGCTCT-GCAAGGCCTTCAT   | 2/10 |
| T0-9(1) |                                       |      |
| WT      | GTAGAGTGAGGAAGAAGCTCTTGCAAGGCCTTCAT   | 2/10 |
| d3      | GTAGAGTGAGGAAGAAG---TTGCAAGGCCTTCAT   | 2/10 |
| d2      | GTAGAGTGAGGAAGAAGC---TTGCAAGGCCTTCAT  | 1/10 |
| i1      | GTAGAGTGAGGAAGAAGCTCTTGTGCAAGGCCTTCAT | 5/10 |

sgRNA2  
-SIPIF4

|         |          |                                      |  |      |
|---------|----------|--------------------------------------|--|------|
|         | T0-9(2)  |                                      |  |      |
|         | WT       | GTAGAGTGAGGAAGAAGCTCTTGCAAGGCCTTCAT  |  | 7/9  |
|         | i1       | GTAGAGTGAGGAAGAAGCTCTTGTCAAGGCCTTCAT |  | 1/9  |
|         | d1       | GTAGAGTGAGGAAGAAGCTCT-GCAAGGCCTTCAT  |  | 1/9  |
|         | T0-10    |                                      |  |      |
|         | WT       | GTAGAGTGAGGAAGAAGCTCTTGCAAGGCCTTCAT  |  |      |
|         | d3       | GTAGAGTGAGGAAGAAGCT---GCAAGGCCTTCAT  |  | 6/13 |
|         | i1       | GTAGAGTGAGGAAGAAGCTCTTGTCAAGGCCTTCAT |  | 7/13 |
|         | T0-11    |                                      |  |      |
|         | WT       | GTAGAGTGAGGAAGAAGCTCTTGCAAGGCCTTCAT  |  |      |
|         | d3       | GTAGAGTGAGGAAGAAGCT---GCAAGGCCTTCAT  |  | 1/6  |
|         | i1       | GTAGAGTGAGGAAGAAGCTCTTGTCAAGGCCTTCAT |  | 2/6  |
|         | d2       | GTAGAGTGAGGAAGAAGCT--TGCAAGGCCTTCAT  |  | 3/6  |
|         | T0-12    |                                      |  |      |
|         | WT       | GTAGAGTGAGGAAGAAGCTCTTGCAAGGCCTTCAT  |  |      |
|         | d17      | GTAGAGTGAGG-----CCTTCAT              |  | 1/9  |
|         | d6       | GTAGAGTGAGGAAGAA-----GCAAGGCCTTCAT   |  | 1/9  |
|         | d2       | GTAGAGTGAGGAAGAAGCTC--GCAAGGCCTTCAT  |  | 3/9  |
| sgRNA2  | d6a      | GTAGAGTGAGGAAGA-----TGCAAGGCCTTCAT   |  | 4/9  |
| -SIP1F4 | T0-13    |                                      |  |      |
|         | WT       | GTAGAGTGAGGAAGAAGCTCTTGCAAGGCCTTCAT  |  |      |
|         | d1       | GTAGAGTGAGGAAGAAGCTCT-GCAAGGCCTTCAT  |  |      |
|         | T0-13    | Mixed tissues                        |  |      |
|         | WT       | GTAGAGTGAGGAAGAAGCTCTTGCAAGGCCTTCAT  |  |      |
|         | d1       | GTAGAGTGAGGAAGAAGCTCT-GCAAGGCCTTCAT  |  |      |
|         | T0-13(1) |                                      |  |      |
|         | WT       | GTAGAGTGAGGAAGAAGCTCTTGCAAGGCCTTCAT  |  |      |
|         | d1       | GTAGAGTGAGGAAGAAGCTCT-GCAAGGCCTTCAT  |  |      |
|         | T0-13(2) |                                      |  |      |
|         | WT       | GTAGAGTGAGGAAGAAGCTCTTGCAAGGCCTTCAT  |  |      |
|         | d1       | GTAGAGTGAGGAAGAAGCTCT-GCAAGGCCTTCAT  |  |      |
|         | T0-14    |                                      |  |      |
|         | WT       | GTAGAGTGAGGAAGAAGCTCTTGCAAGGCCTTCAT  |  |      |
|         | d17      | GTAGAGTGAGG-----CCTTCAT              |  | 1/8  |
|         | d6       | GTAGAGTGAGGAAGAA-----GCAAGGCCTTCAT   |  | 3/8  |
|         | d1       | GTAGAGTGAGGAAGAAGCTCT-GCAAGGCCTTCAT  |  | 2/8  |
|         | i1       | GTAGAGTGAGGAAGAAGCTCTTGTCAAGGCCTTCAT |  | 2/8  |
|         | T0-15    |                                      |  |      |
|         | WT       | GTAGAGTGAGGAAGAAGCTCTTGCAAGGCCTTCAT  |  |      |
|         | d1       | GTAGAGTGAGGAAGAAGCTCT-GCAAGGCCTTCAT  |  | 5/10 |
|         | d2       | GTAGAGTGAGGAAGAAGCT--TGCAAGGCCTTCAT  |  | 4/10 |
|         | d2a      | GTAGAGTGAGGAAGAAGCTC--GCAAGGCCTTCAT  |  | 1/10 |
|         | T0-15    | Mixed tissues                        |  |      |
|         | WT       | GTAGAGTGAGGAAGAAGCTCTTGCAAGGCCTTCAT  |  |      |

|                 |          |                                      |      |
|-----------------|----------|--------------------------------------|------|
|                 | d1       | GTAGAGTGAGGAAGAAGCTCT-GCAAGGCCTTCAT  | 8/16 |
|                 | d2       | GTAGAGTGAGGAAGAAGCT--TGCAAGGCCTTCAT  | 8/16 |
|                 | T0-16    |                                      |      |
|                 | WT       | GTAGAGTGAGGAAGAAGCTCTTGCAAGGCCTTCAT  |      |
|                 | d1       | GTAGAGTGAGGAAGAAGCTCT-GCAAGGCCTTCAT  | 3/5  |
|                 | d3       | GTAGAGTGAGGAAGAAGCT---GCAAGGCCTTCAT  | 1/5  |
|                 | d2       | GTAGAGTGAGGAAGAAGCTC--GCAAGGCCTTCAT  | 1/5  |
|                 | T0-17    |                                      |      |
|                 | WT       | GTAGAGTGAGGAAGAAGCTCTTGCAAGGCCTTCAT  |      |
|                 | d1       | GTAGAGTGAGGAAGAAGCTCT-GCAAGGCCTTCAT  |      |
|                 | T0-17    | Mixed tissues                        |      |
|                 | WT       | GTAGAGTGAGGAAGAAGCTCTTGCAAGGCCTTCAT  |      |
|                 | d1       | GTAGAGTGAGGAAGAAGCTCT-GCAAGGCCTTCAT  |      |
|                 | T0-17(1) |                                      |      |
|                 | WT       | GTAGAGTGAGGAAGAAGCTCTTGCAAGGCCTTCAT  |      |
|                 | d1       | GTAGAGTGAGGAAGAAGCTCT-GCAAGGCCTTCAT  |      |
|                 | T0-17(2) |                                      |      |
|                 | WT       | GTAGAGTGAGGAAGAAGCTCTTGCAAGGCCTTCAT  |      |
|                 | d1       | GTAGAGTGAGGAAGAAGCTCT-GCAAGGCCTTCAT  |      |
| sgRNA2          | T0-18    |                                      |      |
| - <i>SIP1F4</i> | WT       | GTAGAGTGAGGAAGAAGCTCTTGCAAGGCCTTCAT  |      |
|                 | i1       | GTAGAGTGAGGAAGAAGCTCTTTGCAAGGCCTTCAT | 7/13 |
|                 | c43      | AA--GATCGTGTATACTTCCGTGCAAGGCCTTCAT  | 6/13 |
|                 | T0-19    |                                      |      |
|                 | WT       | GTAGAGTGAGGAAGAAGCTCTTGCAAGGCCTTCAT  |      |
|                 | d1       | GTAGAGTGAGGAAGAAGCTCT-GCAAGGCCTTCAT  |      |
|                 | T0-19    | Mixed tissues                        |      |
|                 | WT       | GTAGAGTGAGGAAGAAGCTCTTGCAAGGCCTTCAT  |      |
|                 | d1       | GTAGAGTGAGGAAGAAGCTCT-GCAAGGCCTTCAT  |      |

DNA was extracted from the leaves or mixed tissues of T0 plants, then amplified by PCR and sequenced. On the first round, homozygote and WT were identified, with PCR product was one type. For others, DNA were cloned and a number of clones were sequenced. In X/Y, Y is the number clones sequenced, and X is the number of clones which showed a specific sequence. #WT, no mutations were detected at target sites. § Mixed tissues included leaves, shoots and flowers. d#, # of bp deleted at the target sites; d#a, same number base of deletion at one site; i#, # number of bases insertion at target sites; i#a, same number base of deletion at one site; i#b, same number base of deletion at other sites ; c#: combined mutation. PAM (NGG) is indicated in orange; The 20 bp target sequence is marked in green; the bases colored red and blue mean insertion and substitution respectively.

**Supplementary Table S9.** Chromosomal locations of tomato U6 genes.

| Gene          | Chromosome | Strand | Location          |
|---------------|------------|--------|-------------------|
| <i>SIU6-1</i> | ch01       | -      | 5813051-5813153   |
| <i>SIU6-2</i> | ch01       | +      | 92151263-92151365 |
| <i>SIU6-3</i> | ch07       | -      | 292992-293094     |
| <i>SIU6-4</i> | ch07       | +      | 327864-327966     |
| <i>SIU6-5</i> | ch07       | +      | 329337-329439     |
| <i>SIU6-6</i> | ch07       | -      | 2045653-2045755   |
| <i>SIU6-7</i> | ch09       | -      | 5169327-5169429   |

**Supplementary Table S10.** Primers used in the study.

| Primer names             | Sequence of primers              | Aims                       |
|--------------------------|----------------------------------|----------------------------|
| sgRNA1- <i>SIPDS</i> -F  | 5' TCTCCTATCCTCGTTTGTCGT 3'      | Genotyping                 |
| sgRNA1- <i>SIPDS</i> -R  | 5' TTGCTTTCTCATCCAGTCCTT 3'      |                            |
| sgRNA2- <i>SIPDS</i> -F  | 5' ATGGTGAGCTAATCACGAGTAA 3'     |                            |
| sgRNA2- <i>SIPDS</i> -R  | 5' AAAGAGAGGCAGGTAGACAATC 3'     |                            |
| sgRNA1- <i>SIPIF4</i> -F | 5' ATACGGGGTGAGTTAGCGA 3'        |                            |
| sgRNA1- <i>SIPIF4</i> -R | 5' AGTGGCAGGTGCATTACTATTA 3'     |                            |
| sgRNA2- <i>SIPIF4</i> -F | 5' GAGGAAACAAGTCAGCCCA 3'        |                            |
| sgRNA2- <i>SIPIF4</i> -R | 5' TCGCTAACTACCCCGTAT 3'         |                            |
| OFF1-F                   | 5' ACGATTGATGGATTGTGAAG 3'       | Off-target analysis        |
| OFF1-R                   | 5' TTCAGGGACGAATGTTTGTAG 3'      |                            |
| OFF2-F                   | 5' GTGCCTTGCCTATCTACTGG 3'       |                            |
| OFF2-R                   | 5' CATTGCGTCAACATCACCT 3'        |                            |
| OFF3-F                   | 5' CATGATTAGGCCAGGATTC 3'        |                            |
| OFF3-R                   | 5' GAAGTGTAACCCCTGAAT 3'         |                            |
| OFF4-F                   | 5' ACAATGGATTTACGACTCTC 3'       |                            |
| OFF4-R                   | 5' AAACCCGTTCCGTCTGTAG 3'        |                            |
| OFF5-F                   | 5' AGCTGAATATCATAGGTTTTCT 3'     |                            |
| OFF5-R                   | 5' CTCTATCACCGAAGTGGCTAG 3'      |                            |
| OFF6-F                   | 5' AAGAAATCTGTTGTTTCAGTATCAGT 3' |                            |
| OFF6-R                   | 5' AGTTGTAACGGTTAAAGGGC 3'       |                            |
| OFF7-F                   | 5' CACCTCAGTTTTTCACATCAGC 3'     |                            |
| OFF7-R                   | 5' CTCGCTCTACGATAGCACATT 3'      |                            |
| OFF8-F                   | 5' ATGGGACGATAATGAACACTG 3'      |                            |
| OFF8-R                   | 5' GCATCTCTTTAGGTCAGCATC 3'      |                            |
| OFF9-F                   | 5' GCCTCCTTACATTACAAGAACTA 3'    |                            |
| OFF9-R                   | 5' AGACGCACAAATCGGACTAT 3'       |                            |
| SIUbi-1F                 | 5' TCCATCTCGTGCTCCGTCT 3'        |                            |
| SIUbi-1R                 | 5' CTGAACCTTTCCAGTGTCAT 3'       |                            |
| Cas9-F                   | 5' GACGCTAATCTGGACAAAGTG 3'      |                            |
| Cas9-R                   | 5' TCAGGGTAAACAGGTGGATG 3'       |                            |
| sgRNA1- <i>SIPDS</i> -F  | 5' CGATTGCAATGGAGTTTTAGAG 3'     |                            |
| sgRNA1- <i>SIPDS</i> -R  | 5' GTGCCACTTTTTCAAGTTGAT 3'      |                            |
| sgRNA1- <i>SIPIF4</i> -F | 5' GGGTCCGCCTTGTTTTAGA 3'        |                            |
| sgRNA1- <i>SIPIF4</i> -R | 5' CCGACTCGGTGCCACTT 3'          |                            |
| sgRNA2- <i>SIPIF4</i> -R | 5' GAAGCTCTTGCAAGTTTTAGAGC 3'    |                            |
| sgRNA2- <i>SIPIF4</i> -R | 5' CGGTGCCACTTTTTCAAGT 3'        |                            |
| Cas9-pCAMBIA1301-F       | 5' ATAAGCCCATCAGAGAGCAG 3'       | Detect the T-DNA<br>region |
| Cas9-pCAMBIA1301-R       | 5' TAGCATTCGCCATTCAGG 3'         |                            |
